# Supplementary material for: Removal of toxic metals from aqueous solution by biochars derived from long-root Eichhornia crassipes
Source: R Soc Open Sci. 2018 Oct 24;5(10):180966. doi: 10.1098/rsos.180966 (PMC6227962; doi:10.1098/rsos.180966)
Supplement: ESM 5 - Adsorption isotherms and thermodynamic studies [file rsos180966supp5.xlsx]

## Sheet: Sheet1
Pb	LEC500	1g/L根粉
		25℃			35					45
	浓度ppm	Ce	Qe		浓度ppm	Ce	Qe			浓度ppm	Ce	Qe			25	35	45
	20	3.276	16.724		20	2.476	17.024			20	2.015	18.424		lnqe/ce	1.63022	1.92798	2.21303							3.3557	0.848953
	40	7.416	24.376		40	6.985	25.011			40	5.185	27.321			1.18996	1.27555	1.66189		1000/T	1000/T	1000/T			3.24675	0.892539
	60	14.315	33.457		60	13.974	34.115			60	12.806	35.115			0.848953	0.892539	1.00871		3.3557	3.24675	3.14465			3.14465	1.00872
	80	24.015	34.387		80	22.247	36.113			80	20.347	38.225			0.359	0.484446	0.630556
	100	31.211	34.411		100	30.245	36.084			100	29.245	38.484			0.0976057	0.176519	0.274534
Cd	LEC500	1g/L根粉
		25℃			35					45
	浓度ppm	Ce	Qe		浓度ppm	Ce	Qe			浓度ppm	Ce	Qe
	20	2.105	18.724		20	2.012	19.024			20	1.987	20.424			2.18549	2.24657	2.33008
	40	6.416	26.415		40	6.113	27.011			40	5.975	28.321			1.41514	1.48583	1.55602		1000/T	1000/T	1000/T			3.3557	1.0473
	60	13.143	37.457		60	12.974	38.115			60	10.806	39.115			1.0473	1.07766	1.2864		3.3557	3.24675	3.14465			3.24675	1.07766
	80	23.015	38.387		80	21.155	40.113			80	19.347	41.225			0.511573	0.639824	0.756507							3.14465	1.2864
	100	29.211	39.411		100	26.245	42.884			100	21.245	43.484			0.2995	0.491023	0.716271
Zn	LEC500	1g/L根粉
		25℃			35					45
	浓度ppm	Ce	Qe		浓度ppm	Ce	Qe			浓度ppm	Ce	Qe
	20	2.0087	18.892		20	1.985	20.024			20	1.849	21.885			2.24125	2.31131	2.47116
	40	6.125	26.887		40	5.985	27.646			40	5.185	29.321			1.47926	1.53022	1.73253		1000/T	1000/T	1000/T			3.3557	1.12997
	60	12.315	38.122		60	12.011	39.014			60	9.806	40.115			1.12997	1.1781	1.40876		3.3557	3.24675	3.14465			3.24675	1.1781
	80	22.015	38.387		80	21.047	41.113			80	18.347	42.225			0.555995	0.669566	0.833546							3.14465	1.40876
	100	28.211	41.411		100	24.245	44.084			100	23.998	44.484			0.383835	0.597886	0.617159
Cu	LEC500	1g/L根粉
		25℃			35					45
	浓度ppm	Ce	Qe		浓度ppm	Ce	Qe			浓度ppm	Ce	Qe
	20	1.276	19.724		20	1.187	20.024			20	1.097	21.424			2.73811	2.8255	2.97193
	40	5.416	27.376		40	4.985	28.011			40	4.185	27.998			1.62031	1.72616	1.90063		1000/T	1000/T	1000/T			3.3557	1.36664
	60	10.315	40.457		60	10.974	42.115			60	8.806	43.115			1.36664	1.34488	1.58844		3.3557	3.24675	3.14465			3.24675	1.34488
	80	19.015	43.387		80	20.247	44.113			80	19.647	44.225			0.824932	0.778748	0.811366							3.14465	1.58844
	100	26.211	44.411		100	22.245	46.084			100	22.945	47.484			0.527308	0.728349	0.727293
