# Supplementary material for: Removal of toxic metals from aqueous solution by biochars derived from long-root Eichhornia crassipes
Source: R Soc Open Sci. 2018 Oct 24;5(10):180966. doi: 10.1098/rsos.180966 (PMC6227962; doi:10.1098/rsos.180966)
Supplement: ESM 7 - Effect of contact time and initial metal concentration on adsorption kinetics [file rsos180966supp7.xlsx]

## Sheet: Sheet1
LEC200
Pb	time	ppm	qt	time	ppm	qt	time	ppm	qt
	0	10	0	0	20	0	0	30
	1	4.243	5.757	1	4.78	15.22	1	14.037	15.963
	3	2.089	7.911	3	3.292	16.708	3	10.704	19.296
	5	1.967	8.033	5	2.576	17.424	5	8.713	21.287
	7	1.439	8.561	7	1.97	18.03	7	7.494	22.506
	9	1.398	8.602	9	1.75	18.25	9	6.925	23.075
	12	1.154	8.846	12	1.475	18.525	12	5.624	24.376
	15	0.951	9.049	15	1.216	18.784	15	4.771	25.229
	17	0.788	9.212	17	1.089	18.911	17	4.202	25.798
	20	0.626	9.374	20	0.924	19.076	20	4.049	25.951
	25	0.604	9.396	25	0.924	19.076	25	3.356	26.644
	30	0.616	9.384	30	0.869	19.131	30	3.288	26.712
	40	0.584	9.416	40	0.832	19.168	40	3.303	26.697
	60	0.611	9.389	60	0.648	19.352	60	3.212	26.788
	90	0.621	9.379	90	0.648	19.352	90	2.983	27.017
	120	0.607	9.393	120	0.538	19.462	120	3.105	26.895
LEC300
Pb	time	ppm	qt	time	ppm	qt	time	ppm	qt
	0	10	0	0	20	0	0	30	0
	1	2.455	7.545	1	4.883	15.117	1	6.722	23.278
	3	1.479	8.521	3	1.443	18.557	3	4.974	25.026
	5	1.236	8.764	5	1.133	18.867	5	4.405	25.595
	7	1.073	8.927	7	0.823	19.177	7	3.389	26.611
	9	0.951	9.049	9	0.916	19.084	9	2.78	27.22
	12	0.788	9.212	12	0.792	19.208	12	2.333	27.667
	15	0.791	9.209	15	0.699	19.301	15	2.089	27.911
	17	0.725	9.275	17	0.606	19.394	17	2.008	27.992
	20	0.688	9.312	20	0.637	19.363	20	1.895	28.105
	25	0.634	9.366	25	0.637	19.363	25	1.81	28.19
	30	0.626	9.374	30	0.61	19.39	30	1.755	28.245
	40	0.604	9.396	40	0.588	19.412	40	1.723	28.277
	60	0.594	9.406	60	0.598	19.402	60	1.754	28.246
	90	0.603	9.397	90	0.621	19.379	90	1.714	28.286
	120	0.589	9.411	120	0.619	19.381	120	1.709	28.291
LEC400
Pb	time	ppm	qt	time	ppm	qt	time	ppm	qt
	0	10	0	0	20	0	0	30	0
	1	0.423	9.577	1	1.123	18.877	1	3.43	26.57
	3	0.382	9.618	3	1.088	18.912	3	2.78	27.22
	5	0.423	9.577	5	1.054	18.946	5	2.495	27.505
	7	0.416	9.584	7	0.914	19.086	7	2.495	27.505
	9	0.382	9.618	9	0.886	19.114	9	2.373	27.627
	12	0.378	9.622	12	0.705	19.295	12	2.089	27.911
	15	0.365	9.635	15	0.636	19.364	15	2.008	27.992
	17	0.37	9.63	17	0.566	19.434	17	1.968	28.032
	20	0.366	9.634	20	0.531	19.469	20	1.926	28.074
	25	0.371	9.629	25	0.531	19.469	25	1.91	28.09
	30	0.373	9.627	30	0.487	19.513	30	1.889	28.111
	40	0.369	9.631	40	0.427	19.573	40	1.878	28.122
	60	0.367	9.633	60	0.427	19.573	60	1.865	28.135
	90	0.366	9.634	90	0.455	19.545	90	1.838	28.162
	120	0.37	9.63	120	0.423	19.577	120	1.857	28.143
LEC500
Pb	time	ppm	qt	time	ppm	qt	time	ppm	qt
	0	10	0	0	20	0	0	30	0
	1	1.804	8.196	1	1.9	18.1	1	3.024	26.976
	3	1.317	8.683	3	1.686	18.314	3	2.333	27.667
	5	1.195	8.805	5	1.472	18.528	5	1.967	28.033
	7	0.951	9.049	7	1.359	18.641	7	1.845	28.155
	9	0.748	9.252	9	1.258	18.742	9	1.764	28.236
	12	0.654	9.346	12	1.251	18.749	12	1.683	28.317
	15	0.619	9.381	15	1.086	18.914	15	1.561	28.439
	17	0.558	9.442	17	1.1	18.9	17	1.357	28.643
	20	0.463	9.537	20	1.001	18.999	20	1.276	28.724
	25	0.463	9.537	25	0.914	19.086	25	1.198	28.802
	30	0.382	9.618	30	0.856	19.144	30	1.195	28.805
	40	0.398	9.602	40	0.875	19.125	40	1.184	28.816
	60	0.382	9.618	60	0.799	19.201	60	1.192	28.808
	90	0.376	9.624	90	0.841	19.159	90	1.183	28.817
	120	0.383	9.617	120	0.819	19.181	120	1.188	28.812
LEC200
Zn	time	ppm	qt	time	ppm	qt	time	ppm	qt
	0	10	0	0	20	0	0	30	0
	1	2.195	7.805	1	3.483	16.517	1	25.677	4.323
	3	1.96	8.04	3	3.306	16.694	3	23.949	6.051
	5	1.707	8.293	5	3.278	16.722	5	22.365	7.635
	7	1.537	8.463	7	3.028	16.972	7	21.096	8.904
	9	1.527	8.473	9	2.933	17.067	9	20.081	9.919
	12	1.371	8.629	12	2.783	17.217	12	20.629	9.371
	15	1.274	8.726	15	2.755	17.245	15	20.081	9.919
	17	1.196	8.804	17	2.66	17.34	17	19.779	10.221
	20	1.113	8.887	20	2.761	17.239	20	19.395	10.605
	25	1.115	8.885	25	2.687	17.313	25	19.066	10.934
	30	1.098	8.902	30	2.713	17.287	30	18.435	11.565
	40	1.089	8.911	40	2.688	17.312	40	18.27	11.73
	60	1.094	8.906	60	2.674	17.326	60	17.889	12.111
	90	1.099	8.901	90	2.658	17.342	90	17.804	12.196
	120	1.095	8.905	120	2.61	17.39	120	18.103	11.897
LEC300
Zn	time	ppm	qt	time	ppm	qt	time	ppm	qt
	0	10	0	0	20	0	0	30	0
	1	1.983	8.017	1	3.797	16.203	1	21.857	8.143
	3	1.164	8.836	3	3.228	16.772	3	19.208	10.792
	5	0.791	9.209	5	2.692	17.308	5	17.593	12.407
	7	0.487	9.513	7	1.228	18.772	7	15.826	14.174
	9	0.478	9.522	9	1.146	18.854	9	12.772	17.228
	12	0.321	9.679	12	1.037	18.963	12	13.832	16.168
	15	0.308	9.692	15	0.981	19.019	15	13.05	16.95
	17	0.225	9.775	17	0.877	19.123	17	11.056	18.944
	20	0.183	9.817	20	0.877	19.123	20	10.426	19.574
	25	0.175	9.825	25	0.816	19.184	25	10.226	19.774
	30	0.169	9.831	30	0.741	19.259	30	9.475	20.525
	40	0.166	9.834	40	0.724	19.276	40	9.232	20.768
	60	0.17	9.83	60	0.698	19.302	60	8.804	21.196
	90	0.165	9.835	90	0.71	19.29	90	8.775	21.225
	120	0.162	9.838	120	0.714	19.286	120	8.912	21.088
LEC400
Zn	time	ppm	qt	time	ppm	qt	time	ppm	qt
	0	10	0	0	20	0	0	30	0
	1	0.685	9.315	1	2.069	17.931	1	18.928	11.072
	3	0.51	9.49	3	1.037	18.963	3	11.85	18.15
	5	0.482	9.518	5	0.923	19.077	5	6.912	23.088
	7	0.475	9.525	7	0.813	19.187	7	3.208	26.792
	9	0.331	9.669	9	0.768	19.232	9	2.276	27.724
	12	0.347	9.653	12	0.711	19.289	12	1.919	28.081
	15	0.214	9.786	15	0.636	19.364	15	1.645	28.355
	17	0.183	9.817	17	0.566	19.434	17	1.562	28.438
	20	0.147	9.853	20	0.423	19.577	20	1.288	28.712
	25	0.15	9.85	25	0.213	19.787	25	1.151	28.849
	30	0.101	9.899	30	0.113	19.887	30	1.041	28.959
	40	0.998	9.002	40	0.098	19.902	40	0.897	29.103
	60	0.121	9.879	60	0.098	19.902	60	0.877	29.123
	90	0.119	9.881	90	0.101	19.899	90	0.787	29.213
	120	0.103	9.897	120	0.089	19.911	120	0.78	29.22
LEC500
Zn	time	ppm	qt	time	ppm	qt	time	ppm	qt
	0	10	0	0	20	0	0	30	0
	1	0.653	9.347	1	1.449	18.551	1	1.265	28.735
	3	0.586	9.414	3	1.086	18.914	3	1.023	28.977
	5	0.477	9.523	5	0.875	19.125	5	0.932	29.068
	7	0.412	9.588	7	0.779	19.221	7	0.992	29.008
	9	0.321	9.679	9	0.652	19.348	9	0.811	29.189
	12	0.28	9.72	12	0.411	19.589	12	0.75	29.25
	15	0.165	9.835	15	0.384	19.616	15	0.75	29.25
	17	0.172	9.828	17	0.211	19.789	17	0.69	29.31
	20	0.089	9.911	20	0.132	19.868	20	0.629	29.371
	25	0.084	9.916	25	0.095	19.905	25	0.599	29.401
	30	0.072	9.928	30	0.077	19.923	30	0.478	29.522
	40	0.068	9.932	40	0.068	19.932	40	0.266	29.734
	60	0.07	9.93	60	0.063	19.937	60	0.235	29.765
	90	0.071	9.929	90	0.05	19.95	90	0.274	29.726
	120	0.072	9.928	120	0.061	19.939	120	0.226	29.774
LEC200
Cu	time	ppm	qt	time	ppm	qt	time	ppm	qt
	0	10	0	0	20	0	0	30	0
	1	9.174	0.826	1	12.622	7.378	1	14.145	15.855
	3	8.587	1.413	3	11.73	8.27	3	13.583	16.417
	5	8.294	1.706	5	11.756	8.244	5	13.046	16.954
	7	7.898	2.102	7	11.098	8.902	7	12.829	17.171
	9	7.56	2.44	9	10.804	9.196	9	12.544	17.456
	12	7.298	2.702	12	9.28	10.72	12	12.345	17.655
	15	6.979	3.021	15	10.163	9.837	15	11.929	18.071
	17	6.887	3.113	17	9.791	10.209	17	11.436	18.564
	20	6.57	3.43	20	9.358	10.642	20	10.984	19.016
	25	6.398	3.602	25	8.994	11.006	25	10.527	19.473
	30	6.098	3.902	30	8.778	11.222	30	9.756	20.244
	40	5.76	4.24	40	7.664	12.336	40	9.147	20.853
	60	5.03	4.97	60	7.615	12.385	60	8.998	21.002
	90	4.98	5.02	90	7.608	12.392	90	9.075	20.925
	120	5.07	4.93	120	7.018	12.982	120	9.142	20.858
LEC300
Cu	time	ppm	qt	time	ppm	qt	time	ppm	qt
	0	10	0	0	20	0	0	30	0
	1	7.47	2.53	1	10.83	9.17	1	13.011	16.989
	3	5.926	4.074	3	9.453	10.547	3	12.414	17.586
	5	4.796	5.204	5	8.467	11.533	5	10.657	19.343
	7	4.464	5.536	7	7.774	12.226	7	9.531	20.469
	9	3.928	6.072	9	6.857	13.143	9	8.51	21.49
	12	3.328	6.672	12	5.446	14.554	12	7.791	22.209
	15	3.124	6.876	15	5.385	14.615	15	7.696	22.304
	17	3.041	6.959	17	5.523	14.477	17	6.908	23.092
	20	3.035	6.965	20	4.943	15.057	20	6.138	23.862
	25	3.022	6.978	25	4.789	15.211	25	5.984	24.016
	30	2.939	7.061	30	4.256	15.744	30	5.684	24.316
	40	2.773	7.227	40	4.158	15.842	40	5.358	24.642
	60	2.575	7.425	60	4.213	15.787	60	5.012	24.988
	90	2.39	7.61	90	4.044	15.956	90	5.144	24.856
	120	2.389	7.611	120	4.21	15.79	120	4.899	25.101
LEC400
Cu	time	ppm	qt	time	ppm	qt	time	ppm	qt
	0	10	0	0	20	0	0	30	0
	1	2.243	7.757	1	3.68	16.32	1	7.012	22.988
	3	0.405	9.595	3	2.113	17.887	3	3.126	26.874
	5	0.291	9.709	5	1.039	18.961	5	1.758	28.242
	7	0.284	9.716	7	0.442	19.558	7	1.039	28.961
	9	0.243	9.757	9	0.39	19.61	9	0.659	29.341
	12	0.284	9.716	12	0.356	19.644	12	0.615	29.385
	15	0.259	9.741	15	0.278	19.722	15	0.478	29.522
	17	0.233	9.767	17	0.275	19.725	17	0.295	29.705
	20	0.22	9.78	20	0.224	19.776	20	0.278	29.722
	25	0.195	9.805	25	0.186	19.814	25	0.174	29.826
	30	0.188	9.812	30	0.186	19.814	30	0.168	29.832
	40	0.169	9.831	40	0.175	19.825	40	0.177	29.823
	60	0.169	9.831	60	0.178	19.822	60	0.187	29.813
	90	0.15	9.85	90	0.169	19.831	90	0.168	29.832
	120	0.162	9.838	120	0.171	19.829	120	0.159	29.841
LEC500
Cu	time	ppm	qt	time	ppm	qt	time	ppm	qt
	0	10	0	0	20	0	0	30	0
	1	0.125	9.875	1	0.243	19.757	1	0.382	29.618
	3	0.125	9.875	3	0.173	19.827	3	0.373	29.627
	5	0.112	9.888	5	0.113	19.887	5	0.269	29.731
	7	0.112	9.888	7	0.148	19.852	7	0.252	29.748
	9	0.106	9.894	9	0.13	19.87	9	0.226	29.774
	12	0.099	9.901	12	0.07	19.93	12	0.148	29.852
	15	0.099	9.901	15	0.079	19.921	15	0.156	29.844
	17	0.086	9.914	17	0.044	19.956	17	0.139	29.861
	20	0.08	9.92	20	0.044	19.956	20	0.13	29.87
	25	0.086	9.914	25	0.038	19.962	25	0.126	29.874
	30	0.08	9.92	30	0.041	19.959	30	0.131	29.869
	40	0.074	9.926	40	0.042	19.958	40	0.129	29.871
	60	0.081	9.919	60	0.045	19.955	60	0.126	29.874
	90	0.079	9.921	90	0.039	19.961	90	0.126	29.874
	120	0.087	9.913	120	0.045	19.955	120	0.127	29.873
LEC200
Cd	time	ppm	qt	time	ppm	qt	time	ppm	qt
	0	10	0	0	20	0	0	30	0
	1	9.867	0.133	1	14.32	5.68	1	21.648	8.352
	3	9.185	0.815	3	12.572	7.428	3	18.857	11.143
	5	8.462	1.538	5	11.416	8.584	5	17.124	12.876
	7	8.255	1.745	7	11.081	8.919	7	16.209	13.791
	9	7.84	2.16	9	10.899	9.101	9	15.151	14.849
	12	7.539	2.461	12	10.654	9.346	12	14.18	15.82
	15	7.399	2.601	15	10.012	9.988	15	14.14	15.86
	17	7.278	2.722	17	9.874	10.126	17	13.755	16.245
	20	7.064	2.936	20	9.685	10.315	20	13.273	16.727
	25	6.877	3.123	25	9.156	10.844	25	13.129	16.871
	30	6.469	3.531	30	8.989	11.011	30	12.452	17.548
	40	6.141	3.859	40	8.178	11.822	40	11.396	18.604
	60	5.586	4.414	60	8.022	11.978	60	11.926	18.074
	90	5.536	4.464	90	7.963	12.037	90	11.926	18.074
	120	5.044	4.956	120	7.774	12.226	120	11.848	18.152
LEC300
Cd	time	ppm	qt	time	ppm	qt	time	ppm	qt
	0	10	0	0	20	0	0	30	0
	1	7.787	2.213	1	14.15	5.85	1	20.997	9.003
	3	6.684	3.316	3	9.158	10.842	3	12.265	17.735
	5	5.981	4.019	5	8.419	11.581	5	10.299	19.701
	7	5.325	4.675	7	7.854	12.146	7	9.941	20.059
	9	4.816	5.184	9	7.133	12.867	9	8.591	21.409
	12	4.475	5.525	12	6.159	13.841	12	8.353	21.647
	15	3.964	6.036	15	5.312	14.688	15	7.955	22.045
	17	3.125	6.875	17	5.112	14.888	17	7.996	22.004
	20	3.096	6.904	20	4.486	15.514	20	6.289	23.711
	25	2.987	7.013	25	4.101	15.899	25	3.908	26.092
	30	2.886	7.114	30	3.289	16.711	30	3.384	26.616
	40	1.775	8.225	40	2.679	17.321	40	3.198	26.802
	60	1.575	8.425	60	2.256	17.744	60	3.084	26.916
	90	1.414	8.586	90	2.284	17.716	90	3.188	26.812
	120	1.388	8.612	120	2.102	17.898	120	3.012	26.988
LEC400
Cd	time	ppm	qt	time	ppm	qt	time	ppm	qt
	0	10	0	0	20	0	0	30	0
	1	7.884	2.116	1	12.724	7.276	1	18.186	11.814
	3	6.589	3.411	3	12.19	7.81	3	13.144	16.856
	5	6.161	3.839	5	7.925	12.075	5	11.238	18.762
	7	5.881	4.119	7	4.698	15.302	7	9.878	20.122
	9	4.159	5.841	9	3.622	16.378	9	7.016	22.984
	12	3.841	6.159	12	2.085	17.915	12	6.105	23.895
	15	1.992	8.008	15	1.97	18.03	15	4.998	25.002
	17	1.171	8.829	17	1.317	18.683	17	3.756	26.244
	20	0.743	9.257	20	1.24	18.76	20	1.884	28.116
	25	0.684	9.316	25	1.125	18.875	25	1.211	28.789
	30	0.581	9.419	30	0.664	19.336	30	0.989	29.011
	40	0.443	9.557	40	0.664	19.336	40	0.884	29.116
	60	0.358	9.642	60	0.549	19.451	60	0.842	29.158
	90	0.321	9.679	90	0.549	19.451	90	0.884	29.116
	120	0.266	9.734	120	0.561	19.439	120	0.789	29.211
LEC500
Cd	time	ppm	qt	time	ppm	qt	time	ppm	qt
	0	10	0	0	20	0	0	30	0
	1	1.021	8.979	1	1.147	18.853	1	1.627	28.373
	3	0.948	9.052	3	1.213	18.787	3	1.541	28.459
	5	0.884	9.116	5	0.988	19.012	5	1.368	28.632
	7	0.789	9.211	7	0.874	19.126	7	1.281	28.719
	9	0.683	9.317	9	0.812	19.188	9	1.022	28.978
	12	0.558	9.442	12	0.796	19.204	12	0.892	29.108
	15	0.497	9.503	15	0.641	19.359	15	0.719	29.281
	17	0.442	9.558	17	0.612	19.388	17	0.676	29.324
	20	0.376	9.624	20	0.546	19.454	20	0.676	29.324
	25	0.227	9.773	25	0.418	19.582	25	0.557	29.443
	30	0.214	9.786	30	0.422	19.578	30	0.432	29.568
	40	0.181	9.819	40	0.389	19.611	40	0.416	29.584
	60	0.175	9.825	60	0.377	19.623	60	0.389	29.611
	90	0.166	9.834	90	0.365	19.635	90	0.373	29.627
	120	0.137	9.863	120	0.374	19.626	120	0.412	29.588
