# Supplementary material for: Removal of toxic metals from aqueous solution by biochars derived from long-root Eichhornia crassipes
Source: R Soc Open Sci. 2018 Oct 24;5(10):180966. doi: 10.1098/rsos.180966 (PMC6227962; doi:10.1098/rsos.180966)
Supplement: ESM 10 - FT-IR spectroscopy materials for LEC400 [file rsos180966supp10.xls]

## Sheet: 9882-3#
3996.36	0.99852	99.852
3994.43	0.99852	99.852
3992.5	0.99852	99.852
3990.57	0.99852	99.852
3988.64	0.99852	99.852
3986.71	0.99852	99.852
3984.78	0.99852	99.852
3982.85	0.99852	99.852
3980.93	0.99852	99.852
3979	0.99852	99.852
3977.07	0.99852	99.852
3975.14	0.99852	99.852
3973.21	0.99852	99.852
3971.28	0.9983	99.83
3969.35	0.99804	99.804
3967.42	0.99781	99.781
3965.5	0.99746	99.746
3963.57	0.99707	99.707
3961.64	0.9968	99.68
3959.71	0.99668	99.668
3957.78	0.99667	99.667
3955.85	0.99665	99.665
3953.92	0.99645	99.645
3951.99	0.99619	99.619
3950.07	0.99605	99.605
3948.14	0.99594	99.594
3946.21	0.99575	99.575
3944.28	0.99563	99.563
3942.35	0.9956	99.56
3940.42	0.99541	99.541
3938.49	0.99502	99.502
3936.56	0.99473	99.473
3934.64	0.99462	99.462
3932.71	0.99472	99.472
3930.78	0.99507	99.507
3928.85	0.99552	99.552
3926.92	0.99558	99.558
3924.99	0.99517	99.517
3923.06	0.99454	99.454
3921.13	0.99382	99.382
3919.21	0.99327	99.327
3917.28	0.99313	99.313
3915.35	0.99306	99.306
3913.42	0.99279	99.279
3911.49	0.99263	99.263
3909.56	0.99247	99.247
3907.63	0.99213	99.213
3905.7	0.99197	99.197
3903.78	0.9918	99.18
3901.85	0.99141	99.141
3899.92	0.99125	99.125
3897.99	0.99143	99.143
3896.06	0.99157	99.157
3894.13	0.99141	99.141
3892.2	0.99107	99.107
3890.28	0.99103	99.103
3888.35	0.99128	99.128
3886.42	0.99137	99.137
3884.49	0.9913	99.13
3882.56	0.9912	99.12
3880.63	0.99109	99.109
3878.7	0.9911	99.11
3876.77	0.99057	99.057
3874.85	0.98938	98.938
3872.92	0.9886	98.86
3870.99	0.98826	98.826
3869.06	0.98802	98.802
3867.13	0.98799	98.799
3865.2	0.9883	98.83
3863.27	0.98847	98.847
3861.34	0.9881	98.81
3859.42	0.98755	98.755
3857.49	0.98717	98.717
3855.56	0.98714	98.714
3853.63	0.98754	98.754
3851.7	0.98801	98.801
3849.77	0.98832	98.832
3847.84	0.98861	98.861
3845.91	0.98901	98.901
3843.99	0.9893	98.93
3842.06	0.98934	98.934
3840.13	0.98929	98.929
3838.2	0.98934	98.934
3836.27	0.98979	98.979
3834.34	0.99051	99.051
3832.41	0.99098	99.098
3830.48	0.99059	99.059
3828.56	0.99019	99.019
3826.63	0.99087	99.087
3824.7	0.99162	99.162
3822.77	0.99192	99.192
3820.84	0.99203	99.203
3818.91	0.99187	99.187
3816.98	0.99149	99.149
3815.05	0.99109	99.109
3813.13	0.9911	99.11
3811.2	0.99162	99.162
3809.27	0.99225	99.225
3807.34	0.99281	99.281
3805.41	0.9934	99.34
3803.48	0.99389	99.389
3801.55	0.99409	99.409
3799.62	0.99408	99.408
3797.7	0.99392	99.392
3795.77	0.99409	99.409
3793.84	0.99445	99.445
3791.91	0.9946	99.46
3789.98	0.99498	99.498
3788.05	0.99553	99.553
3786.12	0.99596	99.596
3784.19	0.9962	99.62
3782.27	0.99622	99.622
3780.34	0.99605	99.605
3778.41	0.99575	99.575
3776.48	0.9957	99.57
3774.55	0.99566	99.566
3772.62	0.99501	99.501
3770.69	0.99452	99.452
3768.76	0.99426	99.426
3766.84	0.99356	99.356
3764.91	0.99279	99.279
3762.98	0.99238	99.238
3761.05	0.99227	99.227
3759.12	0.99212	99.212
3757.19	0.99141	99.141
3755.26	0.99057	99.057
3753.33	0.99033	99.033
3751.41	0.99068	99.068
3749.48	0.99107	99.107
3747.55	0.99107	99.107
3745.62	0.99084	99.084
3743.69	0.99072	99.072
3741.76	0.99082	99.082
3739.83	0.99133	99.133
3737.9	0.99222	99.222
3735.98	0.99306	99.306
3734.05	0.99348	99.348
3732.12	0.99372	99.372
3730.19	0.9939	99.39
3728.26	0.99383	99.383
3726.33	0.9937	99.37
3724.4	0.99379	99.379
3722.47	0.99371	99.371
3720.55	0.99353	99.353
3718.62	0.99394	99.394
3716.69	0.99479	99.479
3714.76	0.99538	99.538
3712.83	0.99495	99.495
3710.9	0.99385	99.385
3708.97	0.99336	99.336
3707.04	0.99365	99.365
3705.12	0.99417	99.417
3703.19	0.99454	99.454
3701.26	0.99475	99.475
3699.33	0.99461	99.461
3697.4	0.99402	99.402
3695.47	0.9937	99.37
3693.54	0.99354	99.354
3691.61	0.99293	99.293
3689.69	0.99194	99.194
3687.76	0.99077	99.077
3685.83	0.98996	98.996
3683.9	0.98963	98.963
3681.97	0.98944	98.944
3680.04	0.98896	98.896
3678.11	0.98813	98.813
3676.18	0.9875	98.75
3674.26	0.98706	98.706
3672.33	0.98599	98.599
3670.4	0.98395	98.395
3668.47	0.98144	98.144
3666.54	0.9787	97.87
3664.61	0.97626	97.626
3662.68	0.97432	97.432
3660.75	0.97247	97.247
3658.83	0.97045	97.045
3656.9	0.96816	96.816
3654.97	0.96556	96.556
3653.04	0.96226	96.226
3651.11	0.95814	95.814
3649.18	0.9541	95.41
3647.25	0.95017	95.017
3645.32	0.94639	94.639
3643.4	0.94307	94.307
3641.47	0.93974	93.974
3639.54	0.93631	93.631
3637.61	0.93299	93.299
3635.68	0.92971	92.971
3633.75	0.92638	92.638
3631.82	0.92301	92.301
3629.89	0.91958	91.958
3627.97	0.91596	91.596
3626.04	0.91205	91.205
3624.11	0.90834	90.834
3622.18	0.90532	90.532
3620.25	0.90265	90.265
3618.32	0.89999	89.999
3616.39	0.89729	89.729
3614.46	0.8948	89.48
3612.54	0.89256	89.256
3610.61	0.8901	89.01
3608.68	0.88721	88.721
3606.75	0.88409	88.409
3604.82	0.88096	88.096
3602.89	0.87843	87.843
3600.96	0.87634	87.634
3599.03	0.87421	87.421
3597.11	0.87183	87.183
3595.18	0.86934	86.934
3593.25	0.86712	86.712
3591.32	0.86499	86.499
3589.39	0.86238	86.238
3587.46	0.85945	85.945
3585.53	0.8565	85.65
3583.6	0.85366	85.366
3581.68	0.85111	85.111
3579.75	0.84878	84.878
3577.82	0.84643	84.643
3575.89	0.84397	84.397
3573.96	0.84147	84.147
3572.03	0.83899	83.899
3570.1	0.83651	83.651
3568.17	0.834	83.4
3566.25	0.83136	83.136
3564.32	0.82859	82.859
3562.39	0.82607	82.607
3560.46	0.824	82.4
3558.53	0.82208	82.208
3556.6	0.82017	82.017
3554.67	0.81832	81.832
3552.74	0.81648	81.648
3550.82	0.81459	81.459
3548.89	0.81262	81.262
3546.96	0.81051	81.051
3545.03	0.80808	80.808
3543.1	0.80538	80.538
3541.17	0.80284	80.284
3539.24	0.80058	80.058
3537.32	0.79844	79.844
3535.39	0.79641	79.641
3533.46	0.79443	79.443
3531.53	0.79236	79.236
3529.6	0.79018	79.018
3527.67	0.78801	78.801
3525.74	0.78583	78.583
3523.81	0.78355	78.355
3521.89	0.78129	78.129
3519.96	0.77929	77.929
3518.03	0.77751	77.751
3516.1	0.77584	77.584
3514.17	0.77418	77.418
3512.24	0.77256	77.256
3510.31	0.77098	77.098
3508.38	0.76944	76.944
3506.46	0.76783	76.783
3504.53	0.76606	76.606
3502.6	0.76424	76.424
3500.67	0.76253	76.253
3498.74	0.76095	76.095
3496.81	0.75944	75.944
3494.88	0.7579	75.79
3492.95	0.75636	75.636
3491.03	0.75492	75.492
3489.1	0.75358	75.358
3487.17	0.75226	75.226
3485.24	0.7509	75.09
3483.31	0.74953	74.953
3481.38	0.74818	74.818
3479.45	0.74685	74.685
3477.52	0.7456	74.56
3475.6	0.74445	74.445
3473.67	0.74336	74.336
3471.74	0.74228	74.228
3469.81	0.74119	74.119
3467.88	0.74008	74.008
3465.95	0.73897	73.897
3464.02	0.73785	73.785
3462.09	0.73675	73.675
3460.17	0.73565	73.565
3458.24	0.73458	73.458
3456.31	0.73368	73.368
3454.38	0.73295	73.295
3452.45	0.73231	73.231
3450.52	0.73175	73.175
3448.59	0.73131	73.131
3446.66	0.73103	73.103
3444.74	0.73086	73.086
3442.81	0.73077	73.077
3440.88	0.73072	73.072
3438.95	0.73069	73.069
3437.02	0.73071	73.071
3435.09	0.73083	73.083
3433.16	0.73104	73.104
3431.23	0.73132	73.132
3429.31	0.73168	73.168
3427.38	0.73205	73.205
3425.45	0.73239	73.239
3423.52	0.73276	73.276
3421.59	0.73326	73.326
3419.66	0.73384	73.384
3417.73	0.73446	73.446
3415.8	0.73514	73.514
3413.88	0.73596	73.596
3411.95	0.73699	73.699
3410.02	0.73816	73.816
3408.09	0.73936	73.936
3406.16	0.74059	74.059
3404.23	0.74183	74.183
3402.3	0.74307	74.307
3400.37	0.74428	74.428
3398.45	0.74547	74.547
3396.52	0.74665	74.665
3394.59	0.74785	74.785
3392.66	0.74908	74.908
3390.73	0.75038	75.038
3388.8	0.75181	75.181
3386.87	0.75335	75.335
3384.94	0.75494	75.494
3383.02	0.75657	75.657
3381.09	0.75825	75.825
3379.16	0.75999	75.999
3377.23	0.76179	76.179
3375.3	0.76365	76.365
3373.37	0.76555	76.555
3371.44	0.76752	76.752
3369.51	0.76957	76.957
3367.59	0.77169	77.169
3365.66	0.77385	77.385
3363.73	0.776	77.6
3361.8	0.77811	77.811
3359.87	0.78023	78.023
3357.94	0.78238	78.238
3356.01	0.78455	78.455
3354.08	0.78672	78.672
3352.16	0.78886	78.886
3350.23	0.79095	79.095
3348.3	0.79303	79.303
3346.37	0.79517	79.517
3344.44	0.79737	79.737
3342.51	0.79959	79.959
3340.58	0.80177	80.177
3338.65	0.80391	80.391
3336.73	0.80601	80.601
3334.8	0.80805	80.805
3332.87	0.81	81
3330.94	0.81189	81.189
3329.01	0.8138	81.38
3327.08	0.81579	81.579
3325.15	0.81781	81.781
3323.22	0.8198	81.98
3321.3	0.82172	82.172
3319.37	0.8236	82.36
3317.44	0.82548	82.548
3315.51	0.82735	82.735
3313.58	0.82922	82.922
3311.65	0.83106	83.106
3309.72	0.83284	83.284
3307.79	0.83453	83.453
3305.87	0.83614	83.614
3303.94	0.83769	83.769
3302.01	0.8392	83.92
3300.08	0.84066	84.066
3298.15	0.84204	84.204
3296.22	0.84334	84.334
3294.29	0.84457	84.457
3292.36	0.84578	84.578
3290.44	0.84698	84.698
3288.51	0.84815	84.815
3286.58	0.84927	84.927
3284.65	0.85038	85.038
3282.72	0.8515	85.15
3280.79	0.85261	85.261
3278.86	0.85367	85.367
3276.93	0.85468	85.468
3275.01	0.85567	85.567
3273.08	0.85665	85.665
3271.15	0.85764	85.764
3269.22	0.85865	85.865
3267.29	0.85968	85.968
3265.36	0.86069	86.069
3263.43	0.86169	86.169
3261.5	0.86265	86.265
3259.58	0.86358	86.358
3257.65	0.86449	86.449
3255.72	0.86542	86.542
3253.79	0.86638	86.638
3251.86	0.86736	86.736
3249.93	0.86838	86.838
3248	0.86946	86.946
3246.07	0.87057	87.057
3244.15	0.87167	87.167
3242.22	0.87273	87.273
3240.29	0.87376	87.376
3238.36	0.87481	87.481
3236.43	0.87586	87.586
3234.5	0.87692	87.692
3232.57	0.87799	87.799
3230.64	0.87906	87.906
3228.72	0.88014	88.014
3226.79	0.88124	88.124
3224.86	0.88237	88.237
3222.93	0.88352	88.352
3221	0.88466	88.466
3219.07	0.8858	88.58
3217.14	0.88694	88.694
3215.21	0.88807	88.807
3213.29	0.88922	88.922
3211.36	0.89042	89.042
3209.43	0.89166	89.166
3207.5	0.89291	89.291
3205.57	0.89416	89.416
3203.64	0.89542	89.542
3201.71	0.89668	89.668
3199.78	0.89792	89.792
3197.86	0.89917	89.917
3195.93	0.90042	90.042
3194	0.90169	90.169
3192.07	0.90297	90.297
3190.14	0.90423	90.423
3188.21	0.90548	90.548
3186.28	0.90672	90.672
3184.36	0.90796	90.796
3182.43	0.9092	90.92
3180.5	0.91043	91.043
3178.57	0.91164	91.164
3176.64	0.91282	91.282
3174.71	0.91401	91.401
3172.78	0.91521	91.521
3170.85	0.91644	91.644
3168.93	0.91767	91.767
3167	0.91889	91.889
3165.07	0.92008	92.008
3163.14	0.92125	92.125
3161.21	0.92242	92.242
3159.28	0.92362	92.362
3157.35	0.92482	92.482
3155.42	0.92596	92.596
3153.5	0.92707	92.707
3151.57	0.92819	92.819
3149.64	0.9293	92.93
3147.71	0.93038	93.038
3145.78	0.93139	93.139
3143.85	0.93237	93.237
3141.92	0.93332	93.332
3139.99	0.93427	93.427
3138.07	0.93522	93.522
3136.14	0.93619	93.619
3134.21	0.93715	93.715
3132.28	0.9381	93.81
3130.35	0.93908	93.908
3128.42	0.94008	94.008
3126.49	0.94108	94.108
3124.56	0.94203	94.203
3122.64	0.94293	94.293
3120.71	0.94383	94.383
3118.78	0.94471	94.471
3116.85	0.94558	94.558
3114.92	0.94646	94.646
3112.99	0.94733	94.733
3111.06	0.94817	94.817
3109.13	0.94899	94.899
3107.21	0.94983	94.983
3105.28	0.95068	95.068
3103.35	0.95151	95.151
3101.42	0.95232	95.232
3099.49	0.95313	95.313
3097.56	0.95397	95.397
3095.63	0.95484	95.484
3093.7	0.95571	95.571
3091.78	0.95656	95.656
3089.85	0.95739	95.739
3087.92	0.95818	95.818
3085.99	0.95896	95.896
3084.06	0.95973	95.973
3082.13	0.96047	96.047
3080.2	0.96114	96.114
3078.27	0.96174	96.174
3076.35	0.96232	96.232
3074.42	0.96289	96.289
3072.49	0.96341	96.341
3070.56	0.96389	96.389
3068.63	0.96436	96.436
3066.7	0.96485	96.485
3064.77	0.96537	96.537
3062.84	0.96591	96.591
3060.92	0.96648	96.648
3058.99	0.96705	96.705
3057.06	0.96762	96.762
3055.13	0.96823	96.823
3053.2	0.96885	96.885
3051.27	0.96947	96.947
3049.34	0.97006	97.006
3047.41	0.97063	97.063
3045.49	0.97119	97.119
3043.56	0.97174	97.174
3041.63	0.9723	97.23
3039.7	0.97285	97.285
3037.77	0.97339	97.339
3035.84	0.97392	97.392
3033.91	0.97444	97.444
3031.98	0.97498	97.498
3030.06	0.97555	97.555
3028.13	0.9761	97.61
3026.2	0.97662	97.662
3024.27	0.97713	97.713
3022.34	0.97764	97.764
3020.41	0.97817	97.817
3018.48	0.97872	97.872
3016.55	0.97927	97.927
3014.63	0.97982	97.982
3012.7	0.98037	98.037
3010.77	0.98092	98.092
3008.84	0.98144	98.144
3006.91	0.98191	98.191
3004.98	0.98234	98.234
3003.05	0.98274	98.274
3001.12	0.98311	98.311
2999.2	0.98346	98.346
2997.27	0.98378	98.378
2995.34	0.98406	98.406
2993.41	0.9843	98.43
2991.48	0.98449	98.449
2989.55	0.98461	98.461
2987.62	0.98464	98.464
2985.69	0.98457	98.457
2983.77	0.98438	98.438
2981.84	0.98408	98.408
2979.91	0.98368	98.368
2977.98	0.98321	98.321
2976.05	0.98268	98.268
2974.12	0.98215	98.215
2972.19	0.98162	98.162
2970.26	0.98112	98.112
2968.34	0.98068	98.068
2966.41	0.98033	98.033
2964.48	0.98006	98.006
2962.55	0.97986	97.986
2960.62	0.97974	97.974
2958.69	0.9797	97.97
2956.76	0.97973	97.973
2954.83	0.97979	97.979
2952.91	0.97987	97.987
2950.98	0.97994	97.994
2949.05	0.97998	97.998
2947.12	0.97993	97.993
2945.19	0.97976	97.976
2943.26	0.97945	97.945
2941.33	0.979	97.9
2939.4	0.97845	97.845
2937.48	0.97782	97.782
2935.55	0.97716	97.716
2933.62	0.9765	97.65
2931.69	0.97591	97.591
2929.76	0.97542	97.542
2927.83	0.97507	97.507
2925.9	0.97487	97.487
2923.97	0.97484	97.484
2922.05	0.975	97.5
2920.12	0.97536	97.536
2918.19	0.97589	97.589
2916.26	0.97656	97.656
2914.33	0.97736	97.736
2912.4	0.97825	97.825
2910.47	0.9792	97.92
2908.54	0.98021	98.021
2906.62	0.98124	98.124
2904.69	0.98225	98.225
2902.76	0.98321	98.321
2900.83	0.98406	98.406
2898.9	0.98481	98.481
2896.97	0.98545	98.545
2895.04	0.98601	98.601
2893.11	0.98651	98.651
2891.19	0.98695	98.695
2889.26	0.98733	98.733
2887.33	0.98766	98.766
2885.4	0.98793	98.793
2883.47	0.98813	98.813
2881.54	0.98829	98.829
2879.61	0.98842	98.842
2877.68	0.98848	98.848
2875.76	0.98848	98.848
2873.83	0.9884	98.84
2871.9	0.98825	98.825
2869.97	0.98806	98.806
2868.04	0.98786	98.786
2866.11	0.98766	98.766
2864.18	0.98749	98.749
2862.25	0.98738	98.738
2860.33	0.98736	98.736
2858.4	0.98745	98.745
2856.47	0.98765	98.765
2854.54	0.98795	98.795
2852.61	0.98834	98.834
2850.68	0.98882	98.882
2848.75	0.98938	98.938
2846.82	0.99001	99.001
2844.9	0.99067	99.067
2842.97	0.99138	99.138
2841.04	0.99211	99.211
2839.11	0.99286	99.286
2837.18	0.99362	99.362
2835.25	0.99436	99.436
2833.32	0.99504	99.504
2831.4	0.99565	99.565
2829.47	0.99617	99.617
2827.54	0.99659	99.659
2825.61	0.99693	99.693
2823.68	0.99722	99.722
2821.75	0.99746	99.746
2819.82	0.99767	99.767
2817.89	0.99787	99.787
2815.97	0.99807	99.807
2814.04	0.99828	99.828
2812.11	0.99849	99.849
2810.18	0.99869	99.869
2808.25	0.99888	99.888
2806.32	0.99905	99.905
2804.39	0.9992	99.92
2802.46	0.99933	99.933
2800.54	0.99944	99.944
2798.61	0.99953	99.953
2796.68	0.99961	99.961
2794.75	0.99968	99.968
2792.82	0.99974	99.974
2790.89	0.99979	99.979
2788.96	0.99982	99.982
2787.03	0.99984	99.984
2785.11	0.99986	99.986
2783.18	0.99986	99.986
2781.25	0.99986	99.986
2779.32	0.99985	99.985
2777.39	0.99983	99.983
2775.46	0.99983	99.983
2773.53	0.99983	99.983
2771.6	0.99984	99.984
2769.68	0.99988	99.988
2767.75	0.99993	99.993
2765.82	1	100
2763.89	1.00007	100.007
2761.96	1.00014	100.014
2760.03	1.00019	100.019
2758.1	1.00024	100.024
2756.17	1.00027	100.027
2754.25	1.00029	100.029
2752.32	1.0003	100.03
2750.39	1.00031	100.031
2748.46	1.00032	100.032
2746.53	1.00031	100.031
2744.6	1.0003	100.03
2742.67	1.00028	100.028
2740.74	1.00025	100.025
2738.82	1.00023	100.023
2736.89	1.0002	100.02
2734.96	1.00016	100.016
2733.03	1.00011	100.011
2731.1	1.00007	100.007
2729.17	1.00004	100.004
2727.24	1.00002	100.002
2725.31	1.00002	100.002
2723.39	1.00001	100.001
2721.46	1.00001	100.001
2719.53	1.00001	100.001
2717.6	1.00002	100.002
2715.67	1.00002	100.002
2713.74	1.00002	100.002
2711.81	1.00002	100.002
2709.88	1.00002	100.002
2707.96	1.00001	100.001
2706.03	0.99999	99.999
2704.1	0.99997	99.997
2702.17	0.99996	99.996
2700.24	0.99997	99.997
2698.31	0.99999	99.999
2696.38	1.00001	100.001
2694.45	1.00002	100.002
2692.53	1.00003	100.003
2690.6	1.00003	100.003
2688.67	1.00004	100.004
2686.74	1.00005	100.005
2684.81	1.00006	100.006
2682.88	1.00007	100.007
2680.95	1.00006	100.006
2679.02	1.00006	100.006
2677.1	1.00006	100.006
2675.17	1.00005	100.005
2673.24	1.00005	100.005
2671.31	1.00004	100.004
2669.38	1.00003	100.003
2667.45	1.00002	100.002
2665.52	1.00001	100.001
2663.59	1	100
2661.67	0.99998	99.998
2659.74	0.99997	99.997
2657.81	0.99997	99.997
2655.88	0.99999	99.999
2653.95	1.00002	100.002
2652.02	1.00006	100.006
2650.09	1.00009	100.009
2648.16	1.00012	100.012
2646.24	1.00016	100.016
2644.31	1.0002	100.02
2642.38	1.00023	100.023
2640.45	1.00026	100.026
2638.52	1.00027	100.027
2636.59	1.00028	100.028
2634.66	1.00029	100.029
2632.73	1.0003	100.03
2630.81	1.0003	100.03
2628.88	1.00029	100.029
2626.95	1.00027	100.027
2625.02	1.00026	100.026
2623.09	1.00024	100.024
2621.16	1.00022	100.022
2619.23	1.00019	100.019
2617.3	1.00015	100.015
2615.38	1.00012	100.012
2613.45	1.0001	100.01
2611.52	1.00009	100.009
2609.59	1.00008	100.008
2607.66	1.00007	100.007
2605.73	1.00006	100.006
2603.8	1.00005	100.005
2601.87	1.00005	100.005
2599.95	1.00006	100.006
2598.02	1.00007	100.007
2596.09	1.00008	100.008
2594.16	1.00009	100.009
2592.23	1.0001	100.01
2590.3	1.00011	100.011
2588.37	1.00013	100.013
2586.44	1.00015	100.015
2584.52	1.00017	100.017
2582.59	1.00017	100.017
2580.66	1.00018	100.018
2578.73	1.00019	100.019
2576.8	1.00019	100.019
2574.87	1.0002	100.02
2572.94	1.00019	100.019
2571.01	1.00019	100.019
2569.09	1.00018	100.018
2567.16	1.00017	100.017
2565.23	1.00016	100.016
2563.3	1.00014	100.014
2561.37	1.00013	100.013
2559.44	1.00011	100.011
2557.51	1.0001	100.01
2555.58	1.00008	100.008
2553.66	1.00007	100.007
2551.73	1.00005	100.005
2549.8	1.00003	100.003
2547.87	1.00001	100.001
2545.94	1	100
2544.01	0.99999	99.999
2542.08	0.99998	99.998
2540.15	0.99996	99.996
2538.23	0.99995	99.995
2536.3	0.99994	99.994
2534.37	0.99994	99.994
2532.44	0.99993	99.993
2530.51	0.99993	99.993
2528.58	0.99992	99.992
2526.65	0.9999	99.99
2524.72	0.99989	99.989
2522.8	0.99987	99.987
2520.87	0.99987	99.987
2518.94	0.99986	99.986
2517.01	0.99986	99.986
2515.08	0.99986	99.986
2513.15	0.99986	99.986
2511.22	0.99986	99.986
2509.29	0.99986	99.986
2507.37	0.99987	99.987
2505.44	0.99988	99.988
2503.51	0.99988	99.988
2501.58	0.99989	99.989
2499.65	0.9999	99.99
2497.72	0.99992	99.992
2495.79	0.99994	99.994
2493.86	0.99997	99.997
2491.94	0.99999	99.999
2490.01	1.00001	100.001
2488.08	1.00003	100.003
2486.15	1.00005	100.005
2484.22	1.00007	100.007
2482.29	1.00008	100.008
2480.36	1.00009	100.009
2478.44	1.00009	100.009
2476.51	1.0001	100.01
2474.58	1.0001	100.01
2472.65	1.00011	100.011
2470.72	1.00011	100.011
2468.79	1.0001	100.01
2466.86	1.0001	100.01
2464.93	1.00009	100.009
2463.01	1.00008	100.008
2461.08	1.00007	100.007
2459.15	1.00006	100.006
2457.22	1.00005	100.005
2455.29	1.00004	100.004
2453.36	1.00003	100.003
2451.43	1.00001	100.001
2449.5	1	100
2447.58	0.99998	99.998
2445.65	0.99996	99.996
2443.72	0.99995	99.995
2441.79	0.99994	99.994
2439.86	0.99993	99.993
2437.93	0.99992	99.992
2436	0.9999	99.99
2434.07	0.99989	99.989
2432.15	0.99989	99.989
2430.22	0.9999	99.99
2428.29	0.99992	99.992
2426.36	0.99993	99.993
2424.43	0.99995	99.995
2422.5	0.99996	99.996
2420.57	0.99998	99.998
2418.64	1	100
2416.72	1.00002	100.002
2414.79	1.00003	100.003
2412.86	1.00005	100.005
2410.93	1.00005	100.005
2409	1.00006	100.006
2407.07	1.00006	100.006
2405.14	1.00005	100.005
2403.21	1.00004	100.004
2401.29	1.00003	100.003
2399.36	1.00002	100.002
2397.43	1.00001	100.001
2395.5	0.99999	99.999
2393.57	0.99997	99.997
2391.64	0.99996	99.996
2389.71	0.99995	99.995
2387.78	0.99994	99.994
2385.86	0.99993	99.993
2383.93	0.99993	99.993
2382	0.99993	99.993
2380.07	0.99993	99.993
2378.14	0.99993	99.993
2376.21	0.99994	99.994
2374.28	0.99994	99.994
2372.35	0.99995	99.995
2370.43	0.99996	99.996
2368.5	0.99997	99.997
2366.57	0.99998	99.998
2364.64	1	100
2362.71	1.00001	100.001
2360.78	1.00002	100.002
2358.85	1.00002	100.002
2356.92	1.00003	100.003
2355	1.00004	100.004
2353.07	1.00004	100.004
2351.14	1.00004	100.004
2349.21	1.00004	100.004
2347.28	1.00004	100.004
2345.35	1.00003	100.003
2343.42	1.00003	100.003
2341.49	1.00002	100.002
2339.57	1.00002	100.002
2337.64	1.00001	100.001
2335.71	1	100
2333.78	0.99999	99.999
2331.85	0.99998	99.998
2329.92	0.99997	99.997
2327.99	0.99995	99.995
2326.06	0.99994	99.994
2324.14	0.99992	99.992
2322.21	0.9999	99.99
2320.28	0.99988	99.988
2318.35	0.99986	99.986
2316.42	0.99984	99.984
2314.49	0.99981	99.981
2312.56	0.99978	99.978
2310.63	0.99975	99.975
2308.71	0.99969	99.969
2306.78	0.99963	99.963
2304.85	0.99959	99.959
2302.92	0.99956	99.956
2300.99	0.99954	99.954
2299.06	0.99953	99.953
2297.13	0.99954	99.954
2295.2	0.99954	99.954
2293.28	0.99954	99.954
2291.35	0.99955	99.955
2289.42	0.99955	99.955
2287.49	0.99956	99.956
2285.56	0.99957	99.957
2283.63	0.99957	99.957
2281.7	0.99958	99.958
2279.77	0.99957	99.957
2277.85	0.99957	99.957
2275.92	0.99958	99.958
2273.99	0.99959	99.959
2272.06	0.9996	99.96
2270.13	0.9996	99.96
2268.2	0.99961	99.961
2266.27	0.9996	99.96
2264.34	0.9996	99.96
2262.42	0.9996	99.96
2260.49	0.99962	99.962
2258.56	0.99965	99.965
2256.63	0.99969	99.969
2254.7	0.99974	99.974
2252.77	0.9998	99.98
2250.84	0.99984	99.984
2248.91	0.99988	99.988
2246.99	0.99991	99.991
2245.06	0.99992	99.992
2243.13	0.99994	99.994
2241.2	0.99994	99.994
2239.27	0.99994	99.994
2237.34	0.99991	99.991
2235.41	0.99989	99.989
2233.48	0.99985	99.985
2231.56	0.99983	99.983
2229.63	0.9998	99.98
2227.7	0.99977	99.977
2225.77	0.99974	99.974
2223.84	0.9997	99.97
2221.91	0.99968	99.968
2219.98	0.99966	99.966
2218.05	0.99965	99.965
2216.13	0.99964	99.964
2214.2	0.99963	99.963
2212.27	0.99963	99.963
2210.34	0.99964	99.964
2208.41	0.99967	99.967
2206.48	0.9997	99.97
2204.55	0.99973	99.973
2202.62	0.99975	99.975
2200.7	0.99977	99.977
2198.77	0.99979	99.979
2196.84	0.99981	99.981
2194.91	0.99984	99.984
2192.98	0.99986	99.986
2191.05	0.99988	99.988
2189.12	0.99989	99.989
2187.19	0.9999	99.99
2185.27	0.99991	99.991
2183.34	0.99993	99.993
2181.41	0.99993	99.993
2179.48	0.99993	99.993
2177.55	0.99993	99.993
2175.62	0.99992	99.992
2173.69	0.99993	99.993
2171.76	0.99993	99.993
2169.84	0.99993	99.993
2167.91	0.99992	99.992
2165.98	0.99991	99.991
2164.05	0.9999	99.99
2162.12	0.9999	99.99
2160.19	0.9999	99.99
2158.26	0.99988	99.988
2156.33	0.99986	99.986
2154.41	0.99984	99.984
2152.48	0.99983	99.983
2150.55	0.99982	99.982
2148.62	0.9998	99.98
2146.69	0.99978	99.978
2144.76	0.99976	99.976
2142.83	0.99974	99.974
2140.9	0.99974	99.974
2138.98	0.99973	99.973
2137.05	0.99972	99.972
2135.12	0.99969	99.969
2133.19	0.99966	99.966
2131.26	0.99963	99.963
2129.33	0.99961	99.961
2127.4	0.99958	99.958
2125.47	0.99955	99.955
2123.55	0.9995	99.95
2121.62	0.99945	99.945
2119.69	0.9994	99.94
2117.76	0.99936	99.936
2115.83	0.99931	99.931
2113.9	0.99925	99.925
2111.97	0.99918	99.918
2110.05	0.9991	99.91
2108.12	0.99903	99.903
2106.19	0.99896	99.896
2104.26	0.99888	99.888
2102.33	0.9988	99.88
2100.4	0.99872	99.872
2098.47	0.99865	99.865
2096.54	0.99858	99.858
2094.62	0.99851	99.851
2092.69	0.99845	99.845
2090.76	0.99839	99.839
2088.83	0.99835	99.835
2086.9	0.9983	99.83
2084.97	0.99826	99.826
2083.04	0.99823	99.823
2081.11	0.99821	99.821
2079.19	0.9982	99.82
2077.26	0.99822	99.822
2075.33	0.99825	99.825
2073.4	0.99829	99.829
2071.47	0.99834	99.834
2069.54	0.99839	99.839
2067.61	0.99845	99.845
2065.68	0.99851	99.851
2063.76	0.99855	99.855
2061.83	0.99859	99.859
2059.9	0.99862	99.862
2057.97	0.99867	99.867
2056.04	0.99872	99.872
2054.11	0.99879	99.879
2052.18	0.99892	99.892
2050.25	0.9991	99.91
2048.33	0.99918	99.918
2046.4	0.99909	99.909
2044.47	0.99886	99.886
2042.54	0.99856	99.856
2040.61	0.9982	99.82
2038.68	0.99784	99.784
2036.75	0.99752	99.752
2034.82	0.99727	99.727
2032.9	0.99708	99.708
2030.97	0.99695	99.695
2029.04	0.99686	99.686
2027.11	0.99683	99.683
2025.18	0.99685	99.685
2023.25	0.99693	99.693
2021.32	0.99706	99.706
2019.39	0.99724	99.724
2017.47	0.99749	99.749
2015.54	0.99777	99.777
2013.61	0.99805	99.805
2011.68	0.99837	99.837
2009.75	0.99871	99.871
2007.82	0.99907	99.907
2005.89	0.99944	99.944
2003.96	0.99969	99.969
2002.04	0.99974	99.974
2000.11	0.99967	99.967
1998.18	0.99961	99.961
1996.25	0.99957	99.957
1994.32	0.99954	99.954
1992.39	0.99956	99.956
1990.46	0.99959	99.959
1988.53	0.99961	99.961
1986.61	0.99961	99.961
1984.68	0.99962	99.962
1982.75	0.99964	99.964
1980.82	0.99967	99.967
1978.89	0.99971	99.971
1976.96	0.99974	99.974
1975.03	0.99977	99.977
1973.1	0.99982	99.982
1971.18	0.99987	99.987
1969.25	0.99988	99.988
1967.32	0.99986	99.986
1965.39	0.99979	99.979
1963.46	0.99968	99.968
1961.53	0.9996	99.96
1959.6	0.99956	99.956
1957.67	0.99953	99.953
1955.75	0.99951	99.951
1953.82	0.9995	99.95
1951.89	0.99951	99.951
1949.96	0.99956	99.956
1948.03	0.99964	99.964
1946.1	0.99967	99.967
1944.17	0.99962	99.962
1942.24	0.99953	99.953
1940.32	0.99943	99.943
1938.39	0.99933	99.933
1936.46	0.99929	99.929
1934.53	0.99929	99.929
1932.6	0.99927	99.927
1930.67	0.99922	99.922
1928.74	0.99916	99.916
1926.81	0.99914	99.914
1924.89	0.99913	99.913
1922.96	0.99912	99.912
1921.03	0.99909	99.909
1919.1	0.99901	99.901
1917.17	0.99894	99.894
1915.24	0.99895	99.895
1913.31	0.99898	99.898
1911.38	0.99895	99.895
1909.46	0.99892	99.892
1907.53	0.99893	99.893
1905.6	0.99897	99.897
1903.67	0.99903	99.903
1901.74	0.99906	99.906
1899.81	0.99904	99.904
1897.88	0.99901	99.901
1895.95	0.99905	99.905
1894.03	0.99914	99.914
1892.1	0.99918	99.918
1890.17	0.99909	99.909
1888.24	0.99894	99.894
1886.31	0.99882	99.882
1884.38	0.99872	99.872
1882.45	0.99866	99.866
1880.52	0.99861	99.861
1878.6	0.99858	99.858
1876.67	0.99858	99.858
1874.74	0.99862	99.862
1872.81	0.99868	99.868
1870.88	0.99877	99.877
1868.95	0.99885	99.885
1867.02	0.99873	99.873
1865.09	0.99851	99.851
1863.17	0.9984	99.84
1861.24	0.99839	99.839
1859.31	0.99838	99.838
1857.38	0.99841	99.841
1855.45	0.99853	99.853
1853.52	0.99863	99.863
1851.59	0.99865	99.865
1849.66	0.99867	99.867
1847.74	0.9986	99.86
1845.81	0.99837	99.837
1843.88	0.99817	99.817
1841.95	0.99816	99.816
1840.02	0.99824	99.824
1838.09	0.99834	99.834
1836.16	0.99845	99.845
1834.23	0.99856	99.856
1832.31	0.99864	99.864
1830.38	0.99874	99.874
1828.45	0.99892	99.892
1826.52	0.99915	99.915
1824.59	0.99928	99.928
1822.66	0.9992	99.92
1820.73	0.99903	99.903
1818.8	0.99899	99.899
1816.88	0.99907	99.907
1814.95	0.99896	99.896
1813.02	0.99872	99.872
1811.09	0.99855	99.855
1809.16	0.99841	99.841
1807.23	0.99819	99.819
1805.3	0.99796	99.796
1803.37	0.9978	99.78
1801.45	0.99766	99.766
1799.52	0.99765	99.765
1797.59	0.99777	99.777
1795.66	0.99783	99.783
1793.73	0.99777	99.777
1791.8	0.99775	99.775
1789.87	0.99777	99.777
1787.94	0.99784	99.784
1786.02	0.99798	99.798
1784.09	0.99816	99.816
1782.16	0.99838	99.838
1780.23	0.99856	99.856
1778.3	0.99866	99.866
1776.37	0.99881	99.881
1774.44	0.99905	99.905
1772.52	0.99912	99.912
1770.59	0.99891	99.891
1768.66	0.99857	99.857
1766.73	0.9983	99.83
1764.8	0.9981	99.81
1762.87	0.99785	99.785
1760.94	0.99757	99.757
1759.01	0.99735	99.735
1757.09	0.99699	99.699
1755.16	0.99646	99.646
1753.23	0.99589	99.589
1751.3	0.99522	99.522
1749.37	0.99441	99.441
1747.44	0.99362	99.362
1745.51	0.99293	99.293
1743.58	0.99228	99.228
1741.66	0.99158	99.158
1739.73	0.99055	99.055
1737.8	0.98916	98.916
1735.87	0.98761	98.761
1733.94	0.98597	98.597
1732.01	0.98422	98.422
1730.08	0.98231	98.231
1728.15	0.98003	98.003
1726.23	0.97736	97.736
1724.3	0.97448	97.448
1722.37	0.97135	97.135
1720.44	0.96792	96.792
1718.51	0.96419	96.419
1716.58	0.96033	96.033
1714.65	0.9565	95.65
1712.72	0.95264	95.264
1710.8	0.94863	94.863
1708.87	0.9446	94.46
1706.94	0.94059	94.059
1705.01	0.9366	93.66
1703.08	0.93277	93.277
1701.15	0.92912	92.912
1699.22	0.92559	92.559
1697.29	0.92213	92.213
1695.37	0.91868	91.868
1693.44	0.91516	91.516
1691.51	0.91166	91.166
1689.58	0.90837	90.837
1687.65	0.90525	90.525
1685.72	0.90215	90.215
1683.79	0.89895	89.895
1681.86	0.89568	89.568
1679.94	0.8924	89.24
1678.01	0.88901	88.901
1676.08	0.88526	88.526
1674.15	0.88128	88.128
1672.22	0.87736	87.736
1670.29	0.87347	87.347
1668.36	0.86947	86.947
1666.43	0.86537	86.537
1664.51	0.86122	86.122
1662.58	0.85699	85.699
1660.65	0.85262	85.262
1658.72	0.84816	84.816
1656.79	0.84374	84.374
1654.86	0.83948	83.948
1652.93	0.83534	83.534
1651	0.8313	83.13
1649.08	0.82738	82.738
1647.15	0.82356	82.356
1645.22	0.81987	81.987
1643.29	0.81653	81.653
1641.36	0.8135	81.35
1639.43	0.81055	81.055
1637.5	0.80782	80.782
1635.57	0.80552	80.552
1633.65	0.80359	80.359
1631.72	0.80184	80.184
1629.79	0.80025	80.025
1627.86	0.79907	79.907
1625.93	0.79833	79.833
1624	0.79781	79.781
1622.07	0.79758	79.758
1620.14	0.79777	79.777
1618.22	0.79826	79.826
1616.29	0.79895	79.895
1614.36	0.79977	79.977
1612.43	0.8007	80.07
1610.5	0.80193	80.193
1608.57	0.80346	80.346
1606.64	0.80512	80.512
1604.71	0.80685	80.685
1602.79	0.80871	80.871
1600.86	0.8106	81.06
1598.93	0.81232	81.232
1597	0.81405	81.405
1595.07	0.81587	81.587
1593.14	0.81759	81.759
1591.21	0.81929	81.929
1589.28	0.8211	82.11
1587.36	0.82295	82.295
1585.43	0.82486	82.486
1583.5	0.82681	82.681
1581.57	0.82836	82.836
1579.64	0.82967	82.967
1577.71	0.83112	83.112
1575.78	0.8327	83.27
1573.85	0.83434	83.434
1571.93	0.83599	83.599
1570	0.83777	83.777
1568.07	0.83971	83.971
1566.14	0.84164	84.164
1564.21	0.84332	84.332
1562.28	0.84467	84.467
1560.35	0.84624	84.624
1558.42	0.84814	84.814
1556.5	0.8501	85.01
1554.57	0.85195	85.195
1552.64	0.8539	85.39
1550.71	0.85616	85.616
1548.78	0.85858	85.858
1546.85	0.86093	86.093
1544.92	0.8632	86.32
1542.99	0.86549	86.549
1541.07	0.86783	86.783
1539.14	0.87007	87.007
1537.21	0.87207	87.207
1535.28	0.87386	87.386
1533.35	0.87597	87.597
1531.42	0.87822	87.822
1529.49	0.87981	87.981
1527.56	0.88112	88.112
1525.64	0.88255	88.255
1523.71	0.88403	88.403
1521.78	0.88528	88.528
1519.85	0.88604	88.604
1517.92	0.88644	88.644
1515.99	0.88698	88.698
1514.06	0.88796	88.796
1512.13	0.88878	88.878
1510.21	0.8892	88.92
1508.28	0.88957	88.957
1506.35	0.89007	89.007
1504.42	0.89049	89.049
1502.49	0.89078	89.078
1500.56	0.89104	89.104
1498.63	0.89122	89.122
1496.7	0.89129	89.129
1494.78	0.89121	89.121
1492.85	0.89108	89.108
1490.92	0.89109	89.109
1488.99	0.89111	89.111
1487.06	0.89087	89.087
1485.13	0.89028	89.028
1483.2	0.88948	88.948
1481.27	0.88901	88.901
1479.35	0.88849	88.849
1477.42	0.88774	88.774
1475.49	0.88685	88.685
1473.56	0.88588	88.588
1471.63	0.88495	88.495
1469.7	0.88401	88.401
1467.77	0.88294	88.294
1465.84	0.88171	88.171
1463.92	0.88055	88.055
1461.99	0.8796	87.96
1460.06	0.87868	87.868
1458.13	0.87767	87.767
1456.2	0.87671	87.671
1454.27	0.87582	87.582
1452.34	0.87488	87.488
1450.41	0.87389	87.389
1448.49	0.87301	87.301
1446.56	0.87239	87.239
1444.63	0.87195	87.195
1442.7	0.87151	87.151
1440.77	0.87098	87.098
1438.84	0.87052	87.052
1436.91	0.87012	87.012
1434.98	0.86963	86.963
1433.06	0.86903	86.903
1431.13	0.86865	86.865
1429.2	0.86842	86.842
1427.27	0.86817	86.817
1425.34	0.86791	86.791
1423.41	0.86771	86.771
1421.48	0.86757	86.757
1419.55	0.86742	86.742
1417.63	0.86718	86.718
1415.7	0.86688	86.688
1413.77	0.86662	86.662
1411.84	0.86651	86.651
1409.91	0.8666	86.66
1407.98	0.86679	86.679
1406.05	0.86706	86.706
1404.13	0.86743	86.743
1402.2	0.86791	86.791
1400.27	0.86848	86.848
1398.34	0.86912	86.912
1396.41	0.86973	86.973
1394.48	0.87036	87.036
1392.55	0.8712	87.12
1390.62	0.87224	87.224
1388.7	0.87345	87.345
1386.77	0.8748	87.48
1384.84	0.87618	87.618
1382.91	0.87757	87.757
1380.98	0.87904	87.904
1379.05	0.88063	88.063
1377.12	0.88226	88.226
1375.19	0.88387	88.387
1373.27	0.88549	88.549
1371.34	0.88717	88.717
1369.41	0.88901	88.901
1367.48	0.89104	89.104
1365.55	0.89316	89.316
1363.62	0.89524	89.524
1361.69	0.89718	89.718
1359.76	0.89895	89.895
1357.84	0.90059	90.059
1355.91	0.90217	90.217
1353.98	0.90366	90.366
1352.05	0.905	90.5
1350.12	0.90619	90.619
1348.19	0.90733	90.733
1346.26	0.9084	90.84
1344.33	0.90937	90.937
1342.41	0.91022	91.022
1340.48	0.91085	91.085
1338.55	0.91125	91.125
1336.62	0.91153	91.153
1334.69	0.91172	91.172
1332.76	0.91181	91.181
1330.83	0.91185	91.185
1328.9	0.9119	91.19
1326.98	0.91201	91.201
1325.05	0.91219	91.219
1323.12	0.91247	91.247
1321.19	0.91287	91.287
1319.26	0.91336	91.336
1317.33	0.91387	91.387
1315.4	0.91437	91.437
1313.47	0.91498	91.498
1311.55	0.91572	91.572
1309.62	0.91655	91.655
1307.69	0.91744	91.744
1305.76	0.91837	91.837
1303.83	0.91933	91.933
1301.9	0.92028	92.028
1299.97	0.92118	92.118
1298.04	0.922	92.2
1296.12	0.92269	92.269
1294.19	0.92325	92.325
1292.26	0.92368	92.368
1290.33	0.92397	92.397
1288.4	0.92415	92.415
1286.47	0.92429	92.429
1284.54	0.92442	92.442
1282.61	0.92454	92.454
1280.69	0.92466	92.466
1278.76	0.92477	92.477
1276.83	0.92489	92.489
1274.9	0.92502	92.502
1272.97	0.92517	92.517
1271.04	0.92535	92.535
1269.11	0.92558	92.558
1267.18	0.92582	92.582
1265.26	0.92607	92.607
1263.33	0.92633	92.633
1261.4	0.92664	92.664
1259.47	0.92701	92.701
1257.54	0.9274	92.74
1255.61	0.9278	92.78
1253.68	0.92821	92.821
1251.75	0.92864	92.864
1249.83	0.92907	92.907
1247.9	0.92949	92.949
1245.97	0.9299	92.99
1244.04	0.93029	93.029
1242.11	0.93067	93.067
1240.18	0.93101	93.101
1238.25	0.93133	93.133
1236.32	0.93164	93.164
1234.4	0.93194	93.194
1232.47	0.93222	93.222
1230.54	0.93247	93.247
1228.61	0.9327	93.27
1226.68	0.93291	93.291
1224.75	0.9331	93.31
1222.82	0.93328	93.328
1220.89	0.93343	93.343
1218.97	0.93357	93.357
1217.04	0.9337	93.37
1215.11	0.93383	93.383
1213.18	0.93396	93.396
1211.25	0.93409	93.409
1209.32	0.9342	93.42
1207.39	0.93429	93.429
1205.46	0.93436	93.436
1203.54	0.93439	93.439
1201.61	0.93439	93.439
1199.68	0.93434	93.434
1197.75	0.93424	93.424
1195.82	0.93408	93.408
1193.89	0.93384	93.384
1191.96	0.93352	93.352
1190.03	0.9331	93.31
1188.11	0.93256	93.256
1186.18	0.93188	93.188
1184.25	0.93105	93.105
1182.32	0.93011	93.011
1180.39	0.92908	92.908
1178.46	0.92795	92.795
1176.53	0.92672	92.672
1174.6	0.92539	92.539
1172.68	0.92395	92.395
1170.75	0.92243	92.243
1168.82	0.92081	92.081
1166.89	0.91909	91.909
1164.96	0.91729	91.729
1163.03	0.91542	91.542
1161.1	0.91352	91.352
1159.17	0.91161	91.161
1157.25	0.9097	90.97
1155.32	0.90783	90.783
1153.39	0.90599	90.599
1151.46	0.90416	90.416
1149.53	0.90231	90.231
1147.6	0.90043	90.043
1145.67	0.8985	89.85
1143.74	0.8965	89.65
1141.82	0.89441	89.441
1139.89	0.89225	89.225
1137.96	0.89002	89.002
1136.03	0.88773	88.773
1134.1	0.88538	88.538
1132.17	0.88296	88.296
1130.24	0.88052	88.052
1128.31	0.8781	87.81
1126.39	0.87576	87.576
1124.46	0.87357	87.357
1122.53	0.87159	87.159
1120.6	0.86989	86.989
1118.67	0.86856	86.856
1116.74	0.86765	86.765
1114.81	0.86719	86.719
1112.88	0.86718	86.718
1110.96	0.86762	86.762
1109.03	0.8685	86.85
1107.1	0.86977	86.977
1105.17	0.87139	87.139
1103.24	0.87331	87.331
1101.31	0.8755	87.55
1099.38	0.87788	87.788
1097.45	0.88038	88.038
1095.53	0.88294	88.294
1093.6	0.88552	88.552
1091.67	0.88805	88.805
1089.74	0.89051	89.051
1087.81	0.89287	89.287
1085.88	0.89512	89.512
1083.95	0.89729	89.729
1082.02	0.89937	89.937
1080.1	0.90138	90.138
1078.17	0.90333	90.333
1076.24	0.90522	90.522
1074.31	0.90706	90.706
1072.38	0.90883	90.883
1070.45	0.91052	91.052
1068.52	0.91214	91.214
1066.59	0.91368	91.368
1064.67	0.91515	91.515
1062.74	0.91657	91.657
1060.81	0.91792	91.792
1058.88	0.9192	91.92
1056.95	0.9204	92.04
1055.02	0.92151	92.151
1053.09	0.9225	92.25
1051.17	0.92338	92.338
1049.24	0.92414	92.414
1047.31	0.92483	92.483
1045.38	0.92548	92.548
1043.45	0.92611	92.611
1041.52	0.92674	92.674
1039.59	0.9274	92.74
1037.66	0.92806	92.806
1035.74	0.92876	92.876
1033.81	0.92951	92.951
1031.88	0.93032	93.032
1029.95	0.93119	93.119
1028.02	0.9321	93.21
1026.09	0.93305	93.305
1024.16	0.93407	93.407
1022.23	0.93516	93.516
1020.31	0.93633	93.633
1018.38	0.93756	93.756
1016.45	0.93883	93.883
1014.52	0.94013	94.013
1012.59	0.94146	94.146
1010.66	0.94281	94.281
1008.73	0.94419	94.419
1006.8	0.94559	94.559
1004.88	0.94699	94.699
1002.95	0.9484	94.84
1001.02	0.94985	94.985
999.089	0.95138	95.138
997.16	0.95296	95.296
995.231	0.9546	95.46
993.303	0.95628	95.628
991.374	0.95801	95.801
989.445	0.95979	95.979
987.517	0.9616	96.16
985.588	0.96341	96.341
983.659	0.96521	96.521
981.73	0.96698	96.698
979.802	0.96874	96.874
977.873	0.9705	97.05
975.944	0.97224	97.224
974.015	0.97394	97.394
972.087	0.97559	97.559
970.158	0.97722	97.722
968.229	0.97884	97.884
966.3	0.98045	98.045
964.372	0.98202	98.202
962.443	0.98354	98.354
960.514	0.98497	98.497
958.585	0.98633	98.633
956.657	0.98764	98.764
954.728	0.98891	98.891
952.799	0.99011	99.011
950.87	0.99124	99.124
948.942	0.99231	99.231
947.013	0.99333	99.333
945.084	0.99431	99.431
943.155	0.99521	99.521
941.227	0.99601	99.601
939.298	0.99671	99.671
937.369	0.99733	99.733
935.44	0.99789	99.789
933.512	0.99838	99.838
931.583	0.99878	99.878
929.654	0.99908	99.908
927.725	0.9993	99.93
925.797	0.99949	99.949
923.868	0.99964	99.964
921.939	0.99978	99.978
920.011	0.99987	99.987
918.082	0.99992	99.992
916.153	0.99994	99.994
914.224	0.99998	99.998
912.296	1.00005	100.005
910.367	1.00014	100.014
908.438	1.00023	100.023
906.509	1.0003	100.03
904.581	1.00039	100.039
902.652	1.00053	100.053
900.723	1.00067	100.067
898.794	1.00074	100.074
896.866	1.00064	100.064
894.937	1.00034	100.034
893.008	0.99986	99.986
891.079	0.99929	99.929
889.151	0.99863	99.863
887.222	0.9979	99.79
885.293	0.99712	99.712
883.364	0.99634	99.634
881.436	0.99562	99.562
879.507	0.99499	99.499
877.578	0.99444	99.444
875.649	0.99396	99.396
873.721	0.99358	99.358
871.792	0.99337	99.337
869.863	0.99333	99.333
867.934	0.99347	99.347
866.006	0.99374	99.374
864.077	0.99412	99.412
862.148	0.99461	99.461
860.219	0.99519	99.519
858.291	0.99584	99.584
856.362	0.99646	99.646
854.433	0.99696	99.696
852.504	0.99727	99.727
850.576	0.9974	99.74
848.647	0.99741	99.741
846.718	0.99733	99.733
844.79	0.99717	99.717
842.861	0.99693	99.693
840.932	0.99662	99.662
839.003	0.99627	99.627
837.075	0.99588	99.588
835.146	0.99544	99.544
833.217	0.99493	99.493
831.288	0.99436	99.436
829.36	0.99379	99.379
827.431	0.99326	99.326
825.502	0.99277	99.277
823.573	0.99228	99.228
821.645	0.99174	99.174
819.716	0.99117	99.117
817.787	0.99061	99.061
815.858	0.99007	99.007
813.93	0.98955	98.955
812.001	0.98903	98.903
810.072	0.98851	98.851
808.143	0.98802	98.802
806.215	0.98757	98.757
804.286	0.98717	98.717
802.357	0.98675	98.675
800.428	0.98628	98.628
798.5	0.98576	98.576
796.571	0.98526	98.526
794.642	0.98481	98.481
792.713	0.98442	98.442
790.785	0.98407	98.407
788.856	0.98375	98.375
786.927	0.98346	98.346
784.998	0.98323	98.323
783.07	0.98304	98.304
781.141	0.98288	98.288
779.212	0.98271	98.271
777.284	0.98252	98.252
775.355	0.9823	98.23
773.426	0.98208	98.208
771.497	0.98189	98.189
769.569	0.98173	98.173
767.64	0.9816	98.16
765.711	0.9815	98.15
763.782	0.98143	98.143
761.854	0.98138	98.138
759.925	0.98136	98.136
757.996	0.98134	98.134
756.067	0.98134	98.134
754.139	0.98139	98.139
752.21	0.98153	98.153
750.281	0.98176	98.176
748.352	0.98206	98.206
746.424	0.98244	98.244
744.495	0.98292	98.292
742.566	0.98342	98.342
740.637	0.98389	98.389
738.709	0.98435	98.435
736.78	0.9848	98.48
734.851	0.98521	98.521
732.922	0.98559	98.559
730.994	0.98592	98.592
729.065	0.9862	98.62
727.136	0.98639	98.639
725.207	0.98651	98.651
723.279	0.98657	98.657
721.35	0.9866	98.66
719.421	0.98657	98.657
717.492	0.98644	98.644
715.564	0.98621	98.621
713.635	0.9859	98.59
711.706	0.98557	98.557
709.778	0.98521	98.521
707.849	0.98481	98.481
705.92	0.98433	98.433
703.991	0.98379	98.379
702.063	0.98323	98.323
700.134	0.98269	98.269
698.205	0.98215	98.215
696.276	0.98164	98.164
694.348	0.98125	98.125
692.419	0.98097	98.097
690.49	0.98041	98.041
688.561	0.97962	97.962
686.633	0.97892	97.892
684.704	0.97839	97.839
682.775	0.97798	97.798
680.846	0.97766	97.766
678.918	0.97742	97.742
676.989	0.97728	97.728
675.06	0.9772	97.72
673.131	0.97713	97.713
671.203	0.97701	97.701
669.274	0.97684	97.684
667.345	0.97664	97.664
665.416	0.97645	97.645
663.488	0.97624	97.624
661.559	0.97601	97.601
659.63	0.97578	97.578
657.701	0.97557	97.557
655.773	0.97543	97.543
653.844	0.97539	97.539
651.915	0.97551	97.551
649.986	0.97576	97.576
648.058	0.97602	97.602
646.129	0.97599	97.599
644.2	0.97557	97.557
642.271	0.97505	97.505
640.343	0.9744	97.44
638.414	0.97326	97.326
636.485	0.97153	97.153
634.557	0.96935	96.935
632.628	0.96693	96.693
630.699	0.96449	96.449
628.77	0.96218	96.218
626.842	0.96006	96.006
624.913	0.95818	95.818
622.984	0.95657	95.657
621.055	0.9553	95.53
619.127	0.95445	95.445
617.198	0.95406	95.406
615.269	0.95412	95.412
613.34	0.95459	95.459
611.412	0.9555	95.55
609.483	0.9569	95.69
607.554	0.95879	95.879
605.625	0.96105	96.105
603.697	0.96347	96.347
601.768	0.96587	96.587
599.839	0.96811	96.811
597.91	0.97008	97.008
595.982	0.97162	97.162
594.053	0.9726	97.26
592.124	0.97302	97.302
590.195	0.97308	97.308
588.267	0.973	97.3
586.338	0.9729	97.29
584.409	0.97283	97.283
582.48	0.97276	97.276
580.552	0.97265	97.265
578.623	0.9725	97.25
576.694	0.97235	97.235
574.765	0.97225	97.225
572.837	0.97218	97.218
570.908	0.97208	97.208
568.979	0.97189	97.189
567.051	0.97169	97.169
565.122	0.97156	97.156
563.193	0.97152	97.152
561.264	0.97152	97.152
559.336	0.9715	97.15
557.407	0.97145	97.145
555.478	0.97137	97.137
553.549	0.97131	97.131
551.621	0.97126	97.126
549.692	0.9712	97.12
547.763	0.97108	97.108
545.834	0.97088	97.088
543.906	0.97069	97.069
541.977	0.97054	97.054
540.048	0.97037	97.037
538.119	0.97015	97.015
536.191	0.96993	96.993
534.262	0.96977	96.977
532.333	0.96967	96.967
530.404	0.96968	96.968
528.476	0.96984	96.984
526.547	0.97009	97.009
524.618	0.97037	97.037
522.689	0.97071	97.071
520.761	0.9712	97.12
518.832	0.97182	97.182
516.903	0.97253	97.253
514.974	0.9733	97.33
513.046	0.97407	97.407
511.117	0.97481	97.481
509.188	0.97555	97.555
507.259	0.97626	97.626
505.331	0.97686	97.686
503.402	0.97731	97.731
501.473	0.9776	97.76
499.544	0.97778	97.778
497.616	0.97786	97.786
495.687	0.97778	97.778
493.758	0.97747	97.747
491.83	0.97694	97.694
489.901	0.97624	97.624
487.972	0.97544	97.544
486.043	0.97458	97.458
484.115	0.97375	97.375
482.186	0.973	97.3
480.257	0.97226	97.226
478.328	0.9715	97.15
476.4	0.97085	97.085
474.471	0.97039	97.039
472.542	0.97016	97.016
470.613	0.97018	97.018
468.685	0.97038	97.038
466.756	0.97066	97.066
464.827	0.97109	97.109
462.898	0.97169	97.169
460.97	0.97245	97.245
459.041	0.97332	97.332
457.112	0.97425	97.425
455.183	0.97522	97.522
453.255	0.97622	97.622
451.326	0.97722	97.722
449.397	0.9782	97.82
447.468	0.9791	97.91
445.54	0.97989	97.989
443.611	0.98066	98.066
441.682	0.98132	98.132
439.753	0.98179	98.179
437.825	0.98219	98.219
435.896	0.98264	98.264
433.967	0.98315	98.315
432.038	0.98372	98.372
430.11	0.9844	98.44
428.181	0.98518	98.518
426.252	0.98614	98.614
424.324	0.98717	98.717
422.395	0.98822	98.822
420.466	0.98822	98.822
418.537	0.98822	98.822
416.609	0.98822	98.822
414.68	0.98822	98.822
412.751	0.98822	98.822
410.822	0.98822	98.822
408.894	0.98822	98.822
406.965	0.98822	98.822
405.036	0.98822	98.822
403.107	0.98822	98.822
401.179	0.98822	98.822
399.25	0.98822	98.822
